# Supplementary material
Source: publisher site journal article supplement (https://www.dovepress.com/article/383969)
Supplement: Supplementary file 1 [file get_supplementary_file.php]

# Appendix

## Employee Benign and Malicious Envy Scale

Items 1-5 and 6-10 separately measure employee benign envy and employee malicious envy.

1. When I envy other members who have higher pay level, I mainly focus on how I could obtain it in future.

2. If I notice that my co-worker is better than me, I’ll try my best to improve myself.

3. Envying other members who have superiority in pay comparison motivates me to accomplish my goals.

4. I strive to reach my envied co-workers’ excellent achievements.

5. If other members have superior qualities, achievements, or possessions, I try my best to attain them.

6. I wish that superior members in pay comparison lose their advantage.

7. If other members have something that brings higher pay level and I don’t have, I wish to take it away from them

8. It is difficult for me to be sincere to other members who are superior to me in pay comparison.

9. Pain with envying other members who have superiority in pay comparison motivates me to dislike them.

10. Seeing the achievements of other members who have advantage in pay comparison makes me resent them.

## Team Member Work Role Performance Scale

1. This subordinate can effectively coordinate work with other members.

2. This subordinate can effectively communicate with other members.

3. This subordinate can provide help to other members when asked or needed.

4. This subordinate can effectively deal with changes affecting our team.

5. This subordinate can learn new skills or take on new roles to cope with changes in the way our team works.

6. This subordinate can respond constructively to changes in the way our team works.

7. This subordinate can suggest ways to make our team more effective.

8. This subordinate can develop new methods to help our team perform better.

9. This subordinate can improve the way our team does things.
